# Supplementary material for: On the use of NMR distance measurements for assessing surface site homogeneity
Source: Royal Society of Chemistry journal article supplement (doi:10.1039/d3dt03201a), 2023-01-01
Supplement: d3dt03201a1.pdf [file d3dt03201a1.pdf]

**Supporting Information for:**

**On the Use of NMR Distance Measurements for Assessing Surface Site Homogeneity**

Frédéric A. Perras<sup>\*a,b</sup>, Damien B. Culver<sup>a</sup>

<sup>a</sup>Chemical and Biological Sciences Division, Ames National Laboratory, Ames, IA 50011, USA

<sup>b</sup>Department of Chemistry, Iowa State University, Ames, IA 50011, USA

\*fperras@ameslab.gov

## Synthetic procedures

### General

All manipulations were performed under an inert atmosphere of nitrogen or argon on a Schlenk line or in a glovebox. THF- $d_8$  and benzene- $d_6$  were purchased from Cambridge Isotope Laboratories and dried over 3 Å molecular sieves prior to use. Pentane was purchased anhydrous from Sigma Aldrich and stored over activated 3 Å molecular sieves prior to use. Anhydrous methanol and tetrahydrofuran were purchased from Sigma Aldrich. Triethylamine was dried over  $\text{CaH}_2$ , distilled under vacuum, and stored over 3 Å molecular sieves prior to use. High surface area  $\gamma$ -alumina ( $\text{BET} = 250 \text{ m}^2 \text{ g}^{-1}$ ) was purchased from Fisher scientific in granule form, sieved to 400 – 250  $\mu\text{m}$ , and dehydroxylated under high vacuum ( $10^{-5}$  torr) for 12 hours at 400, 600, 800, or 1000 °C following the previously outlined procedure.<sup>1</sup>

$^1\text{H}$  NMR spectra were recorded on a Varian MR-400 spectrometer ( $^1\text{H} = 399.80 \text{ MHz}$ ). FTIR spectroscopic analyses were performed on a Bruker Alpha II spectrometer with a transmission module using self-supported 7 mm pellets within an argon filled glovebox. Methane quantifications were performed on an HP 6890 series GC system with an FID detector and an Agilent GS-GASPRO column. Zr analyses were performed on an Agilent 5800 ICP-OES spectrometer. ICP samples were prepared by soaking the solid samples (20 mg) in nitric acid (20 % v/v) overnight, followed by dilution to 2 % nitric acid.

### General procedure for the grafting of $\text{Me}_2\text{SiCp}_2\text{ZrMe}_2$ on partially dehydroxylated alumina

In a Schlenk flask, partially dehydroxylated alumina (200 mg) was suspended in pentane (2 mL). While stirring (100 rpm), a solution of  $\text{Me}_2\text{SiCp}_2\text{ZrMe}_2$  in pentane (34 mM, 2.5 mL, 0.085 mmol,) was added dropwise to the suspension. The reaction was stirred for 30 minutes, then the solution was removed by decantation and the solid was washed twice with pentane (5 mL each time). The solid was dried for 30 minutes under high vacuum, then stored under in an argon filled glovebox. FTIR spectra and Zr loading data are provided below. Methane formation was determined by loading partially dehydroxylated alumina (100 mg) and  $\text{Me}_2\text{SiCp}_2\text{ZrMe}_2$  (13.1 mg, 0.043 mmol) into a round bottom flask (10 mL) and fitting it with a Schlenk adapter in an argon filled glovebox. On a high vacuum Schlenk line, pentane (2 mL) was vacuum distilled into the flask containing the solids at 77 K. The flask was sealed under static vacuum and stirred (100 rpm) for 30 minutes at room temperature. Afterwards, the volatiles were transferred via vacuum distillation to a 1 L flask with a Schlenk adapter at 77 K. The flask was allowed to warm up to room temperature and equilibrate until everything was in the gas phase then analyzed by GC-FID for methane content. A summary of the data is provided in Table S1.

**Table S1.** Summary of characterization data for the zirconocene grafted on activated alumina.

| Dehydroxylation temp. (°C) | Color        | Zr (% mass) <sup>a</sup> | Zr (mmol g <sup>-1</sup> ) <sup>a</sup> | CH <sub>4</sub> (mmol g <sup>-1</sup> ) <sup>b</sup> | CH <sub>4</sub> :Zr |
|----------------------------|--------------|--------------------------|-----------------------------------------|------------------------------------------------------|---------------------|
| 400                        | beige        | 2.1 (3)                  | 0.23 (3)                                | 0.36 (4)                                             | 1.6 (2)             |
| 600                        | light yellow | 2.4 (2)                  | 0.27 (2)                                | 0.32 (1)                                             | 1.20 (5)            |
| 800                        | light orange | 1.6 (2)                  | 0.18 (2)                                | 0.14 (4)                                             | 0.8 (2)             |
| 1000                       | light pink   | 0.63 (3)                 | 0.070 (3)                               | 0.04 (2)                                             | 0.6 (2)             |

<sup>a</sup>ICP analyses were run in triplicate, standard deviations are given in parentheses. <sup>b</sup>Methane released measurements were performed in duplicate and the errors are given in the parentheses.

### Attempts to synthesize the dimethoxy zirconocene precursor

Me<sub>2</sub>SiCp<sub>2</sub>ZrCl<sub>2</sub> + MeOH + Et<sub>3</sub>N: In a PTFE valved NMR tube, Me<sub>2</sub>SiCp<sub>2</sub>ZrCl<sub>2</sub> (20 mg, 57 μmol) was suspended in THF-*d*<sub>8</sub> (0.5 mL) then MeOH in THF (5 % v/v, 0.10 mL, 0.13 mmol) and Et<sub>3</sub>N (18 μL, 0.13 mol) were added to the NMR tube. The reaction was monitored by solution NMR spectroscopy (**Figure S12**). Within 3 hours most of the Me<sub>2</sub>SiCp<sub>2</sub>ZrCl<sub>2</sub> is consumed and several new species form, along with insoluble triethylammonium chloride. After heating at 75 °C for several days, other new species form based on the complicated Si(CH<sub>3</sub>)<sub>2</sub> region, suggesting that the reaction results in multiple species and not the desired Me<sub>2</sub>SiCp<sub>2</sub>Zr(OMe)<sub>2</sub> complex with C<sub>2h</sub> symmetry.

Me<sub>2</sub>SiCp<sub>2</sub>ZrMe<sub>2</sub> + MeOH: In a PTFE valved NMR tube, Me<sub>2</sub>SiCp<sub>2</sub>ZrMe<sub>2</sub> (20 mg, 65 μmol) was suspended in benzene-*d*<sub>6</sub> (0.5 mL) then MeOH in THF (5 % v/v, 0.11 mL, 0.14 mmol) was added by syringe. The reaction was shaken and monitored by solution NMR spectroscopy (**Figure S13**). After 30 minutes, all of the Me<sub>2</sub>SiCp<sub>2</sub>ZrMe<sub>2</sub> is consumed and a new species with C<sub>s</sub> symmetry formed cleanly that is assigned to Me<sub>2</sub>SiCp<sub>2</sub>Zr(OMe)Me, along with methane was observed. Allowing the reaction to run for 3 hours resulted in the formation of several new signals due to the formation of several new species, not just the desired Me<sub>2</sub>SiCp<sub>2</sub>Zr(OMe)<sub>2</sub> complex.

## Supplementary Figures

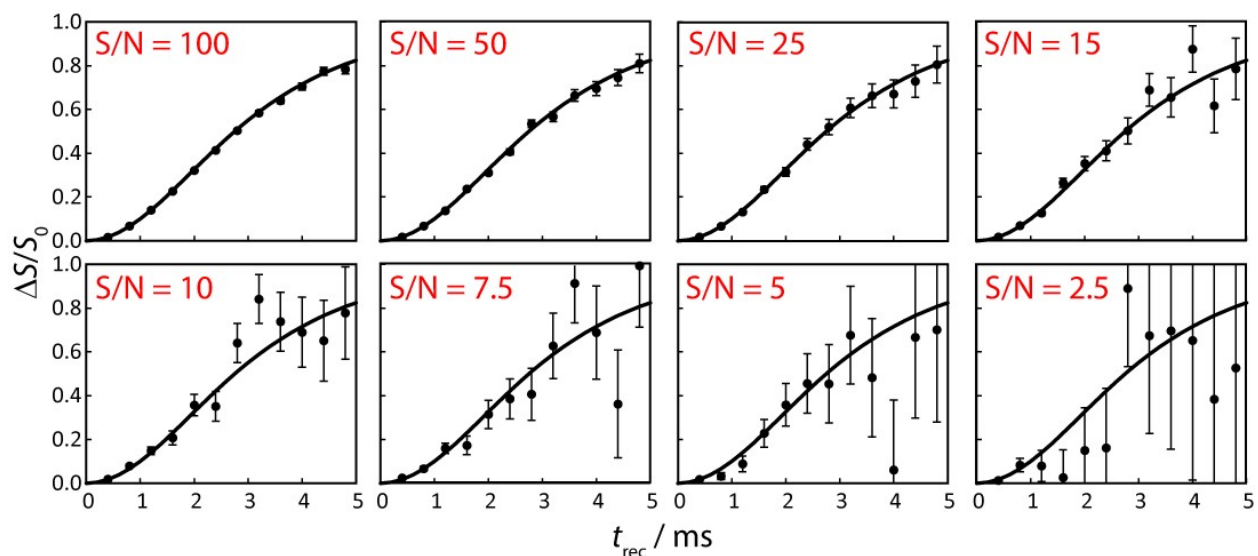

**Figure S1.** Example synthetic  $^{13}\text{C}\{^{27}\text{Al}\}$  RESPDOR data with added Gaussian noise at different maximum S/N levels, with a  $T_2$  of 5 ms. Error bars are presented as  $1\sigma$ .

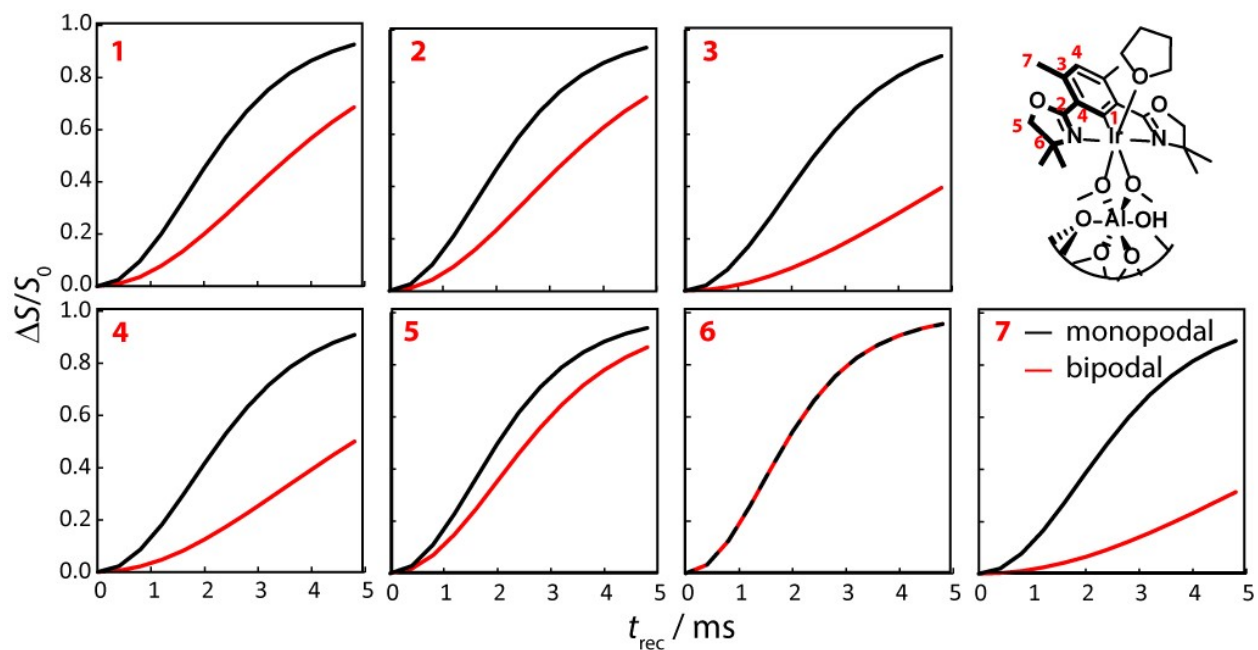

**Figure S2.** Synthetic  $^{13}\text{C}\{^{27}\text{Al}\}$  surface-to-atom RESPDOR data for the pictured  $(^{dm}\text{Phebox})\text{Ir}/\text{Al}_2\text{O}_3$ . Two sets of simulated curves are shown for a more prone monopodal structure (black) and a bipodal configuration (red).

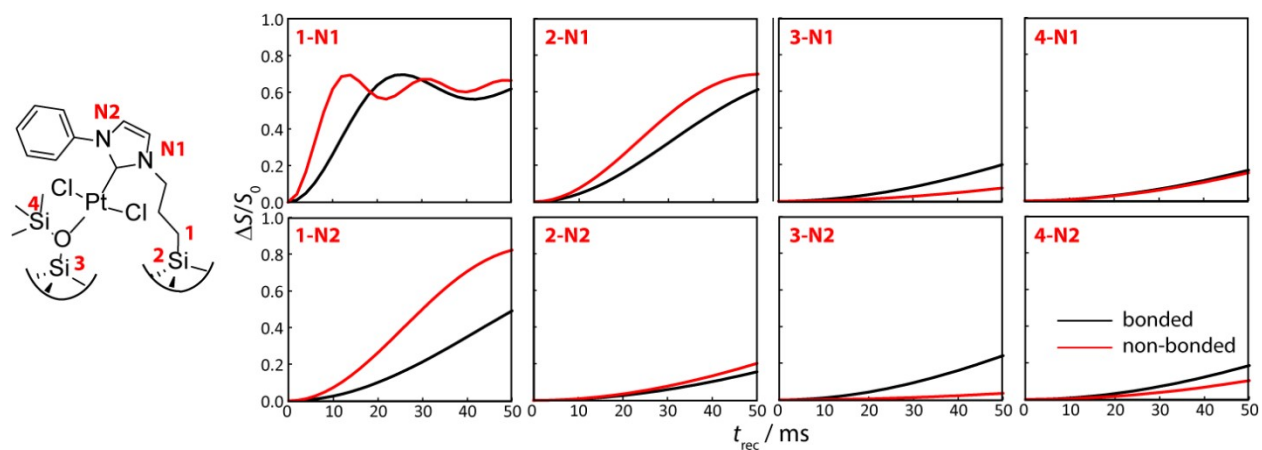

**Figure S3.** Synthetic  $^{13}\text{C},^{29}\text{Si}\{^{15}\text{N}\}$  REDOR data for the pictured (NHC)Pt/SiO<sub>2</sub>. Two sets of simulated curves are shown, one for a structure with a Pt-O-TMS interaction (black) and one without this interaction (red).

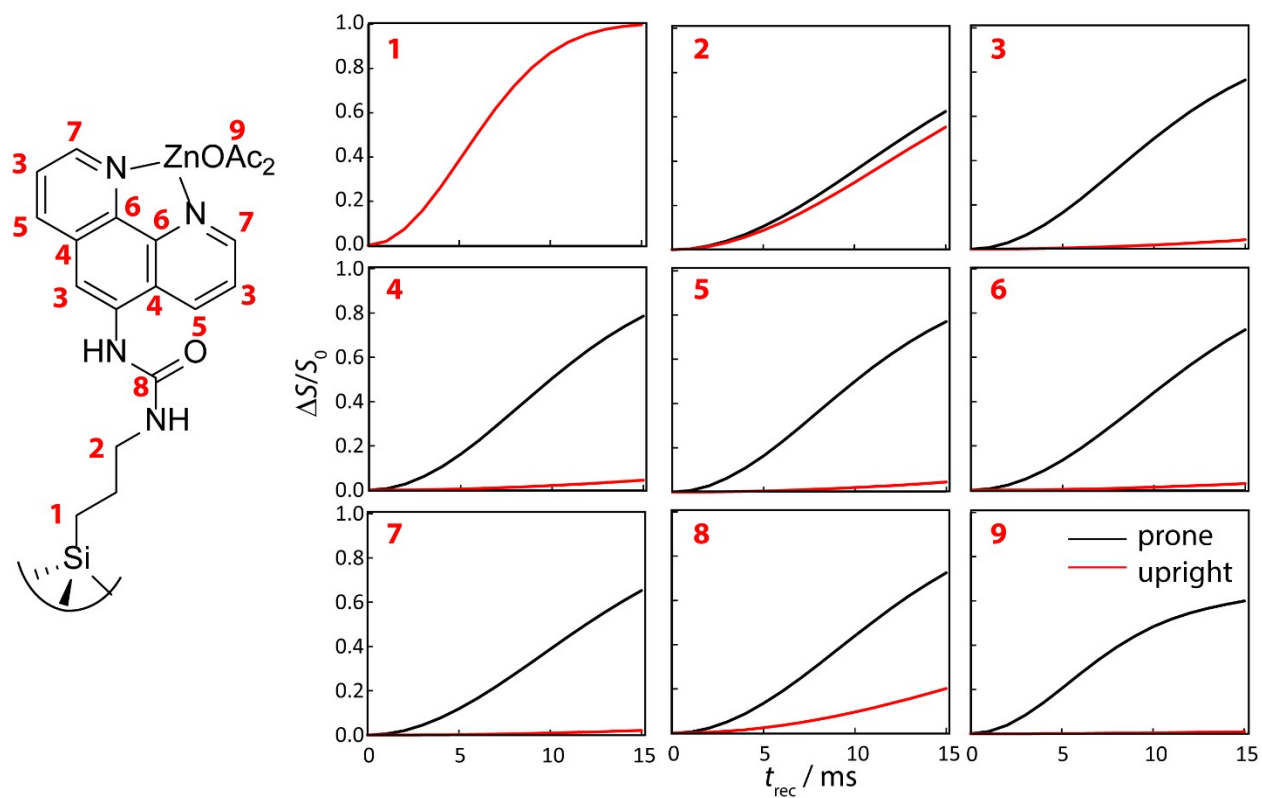

**Figure S4.** Synthetic  $^{13}\text{C}\{^{29}\text{Si}\}$  REDOR data for the pictured (Phen)Zn/SiO<sub>2</sub>. Two sets of simulated curves are shown, one for a structure with a prone structure (black) and one where the ligand is standing up from the surface (red).

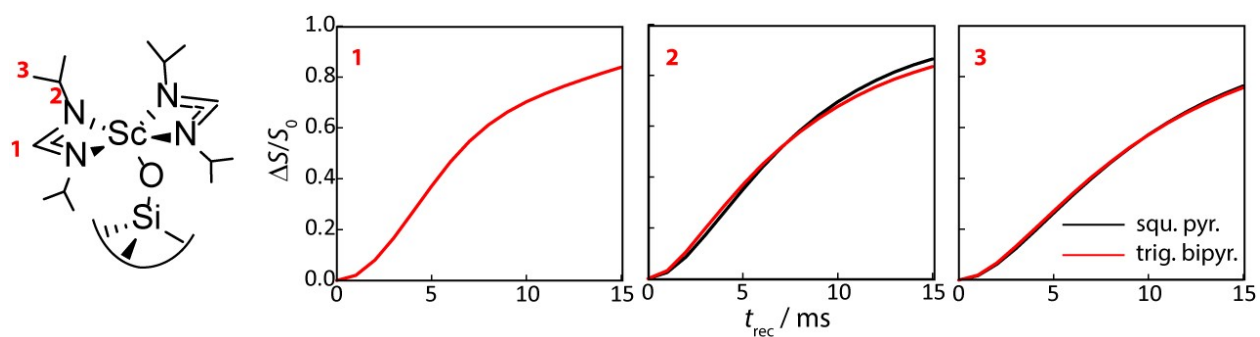

**Figure S5.** Synthetic  $^{13}\text{C}\{^{29}\text{Si}\}$  REDOR data for the pictured  $(\kappa^2\text{-(NiPr)}_2\text{CH})_2\text{Sc}/\text{SiO}_2$ . Two sets of simulated curves are shown, one for a structure with a square pyramidal structure (black) and one with a trigonal bipyramidal structure (red).

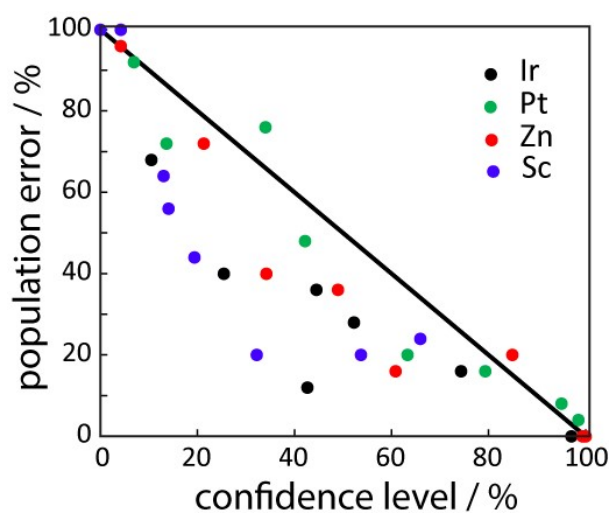

**Figure S6.** Correlation between the confidence level for the various 2-structure fits and the relative error in the predicted site populations. The black line corresponds to error=100%-confidence level.

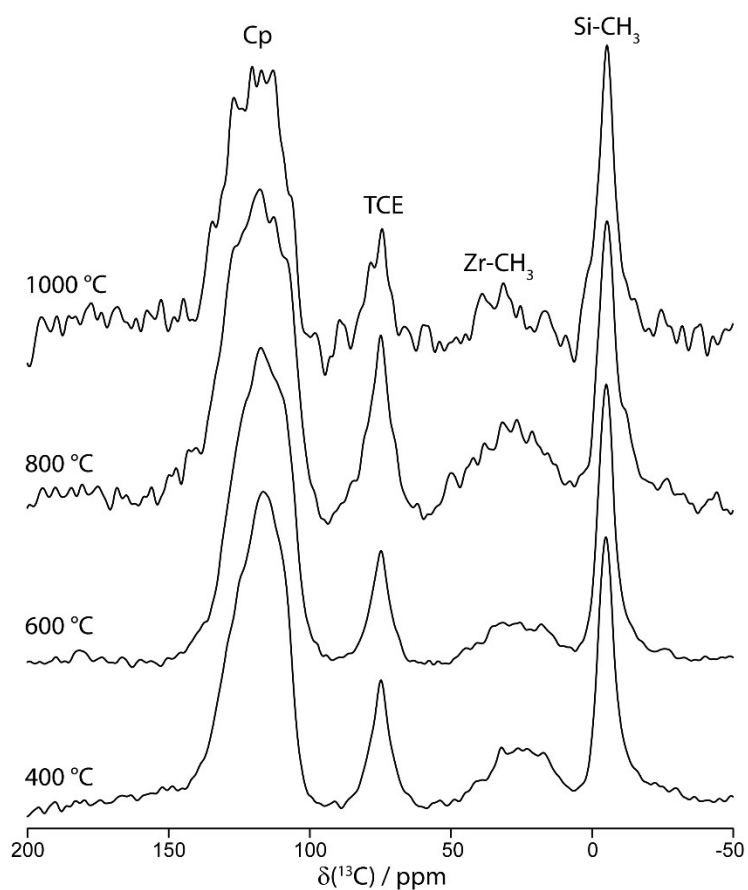

**Figure S7.** DNP-enhanced  $^{13}\text{C}$  CPMAS NMR spectra acquired for the  $\text{Zr}/\text{Al}_2\text{O}_3$  complexes grafted onto  $\text{Al}_2\text{O}_3$  that was thermally activated at different temperatures, as indicated on the Figure.

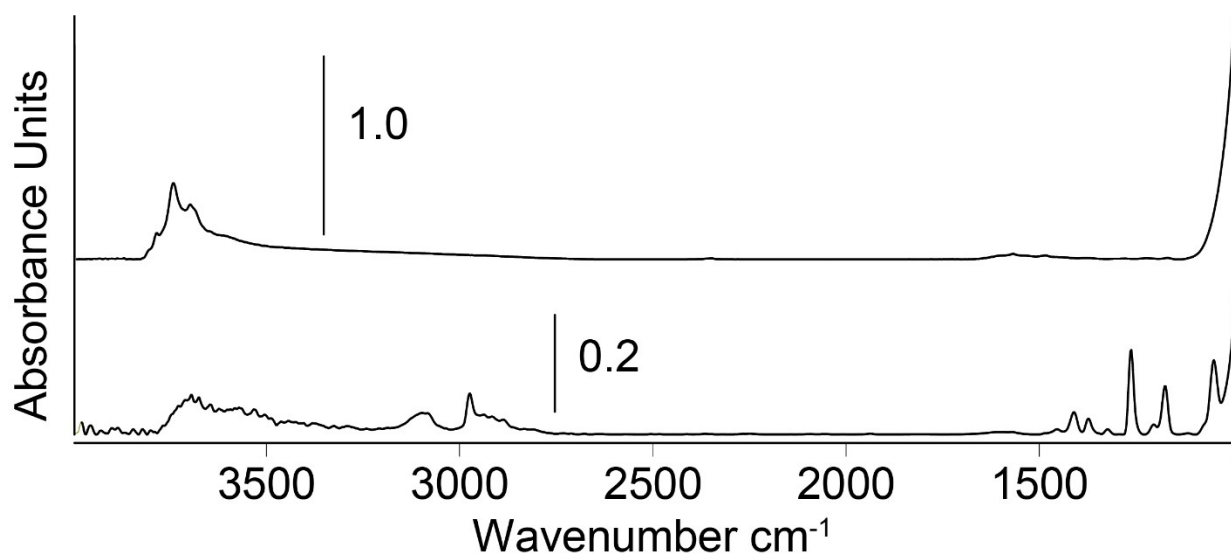

**Figure S8.** FTIR spectra of  $\gamma$ -alumina dehydroxylated at  $400\text{ }^\circ\text{C}$  before (top) and after reaction with  $\text{Me}_2\text{SiCp}_2\text{ZrMe}_2$  (bottom).

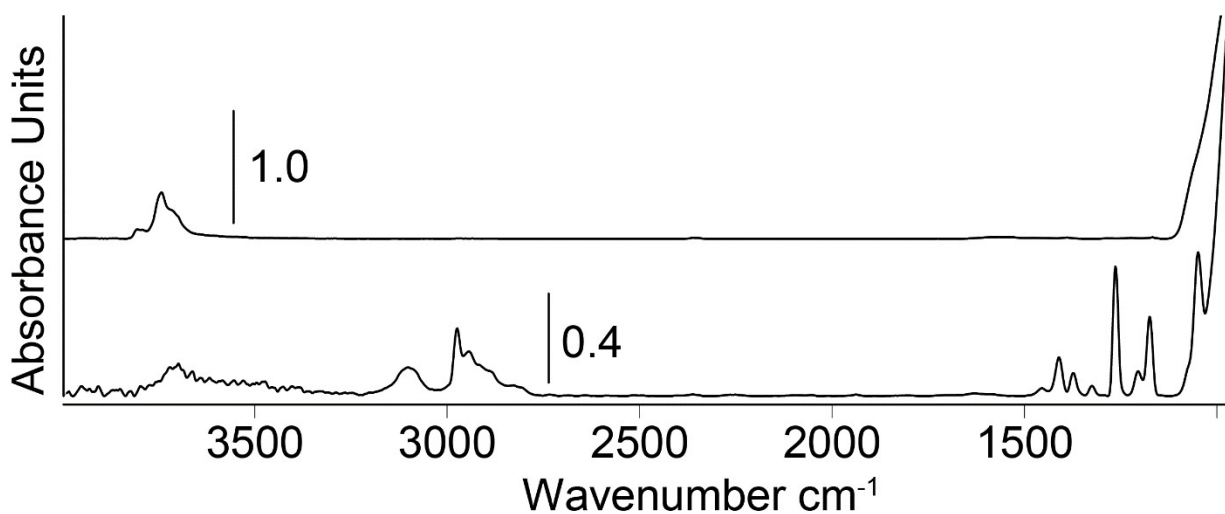

**Figure S9.** FTIR spectra of  $\gamma$ -alumina dehydroxylated at 600 °C before (top) and after reaction with Me<sub>2</sub>SiCp<sub>2</sub>ZrMe<sub>2</sub> (bottom).

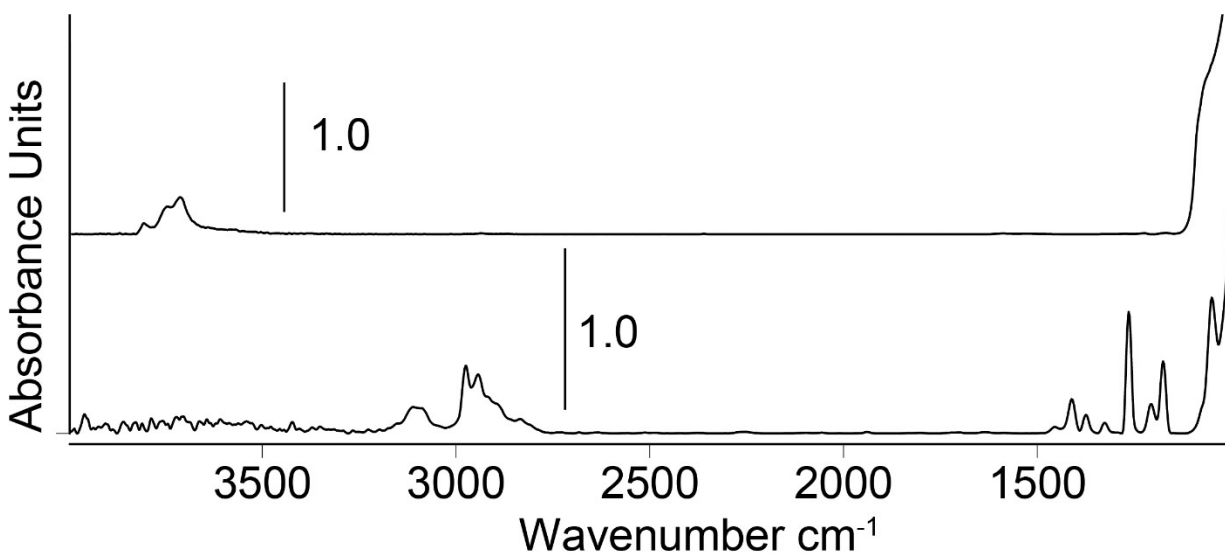

**Figure S10.** FTIR spectra of  $\gamma$ -alumina dehydroxylated at 800 °C before (top) and after reaction with Me<sub>2</sub>SiCp<sub>2</sub>ZrMe<sub>2</sub> (bottom).



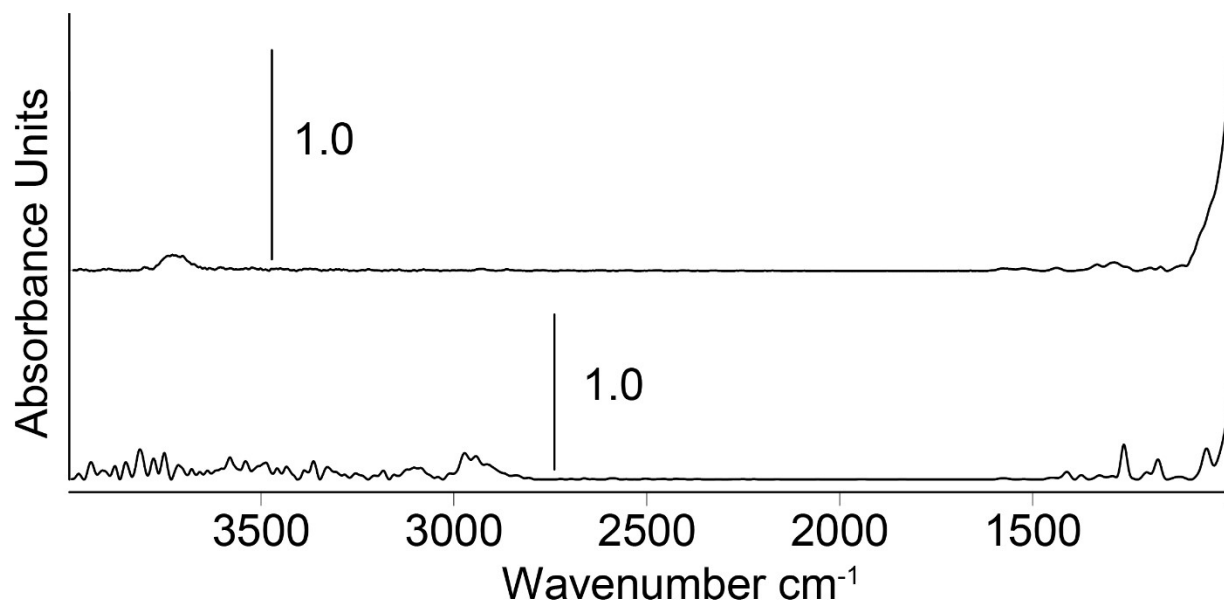

**Figure S11.** FTIR spectra of  $\gamma$ -alumina dehydroxylated at 1000 °C before (top) and after reaction with Me<sub>2</sub>SiCp<sub>2</sub>ZrMe<sub>2</sub> (bottom).

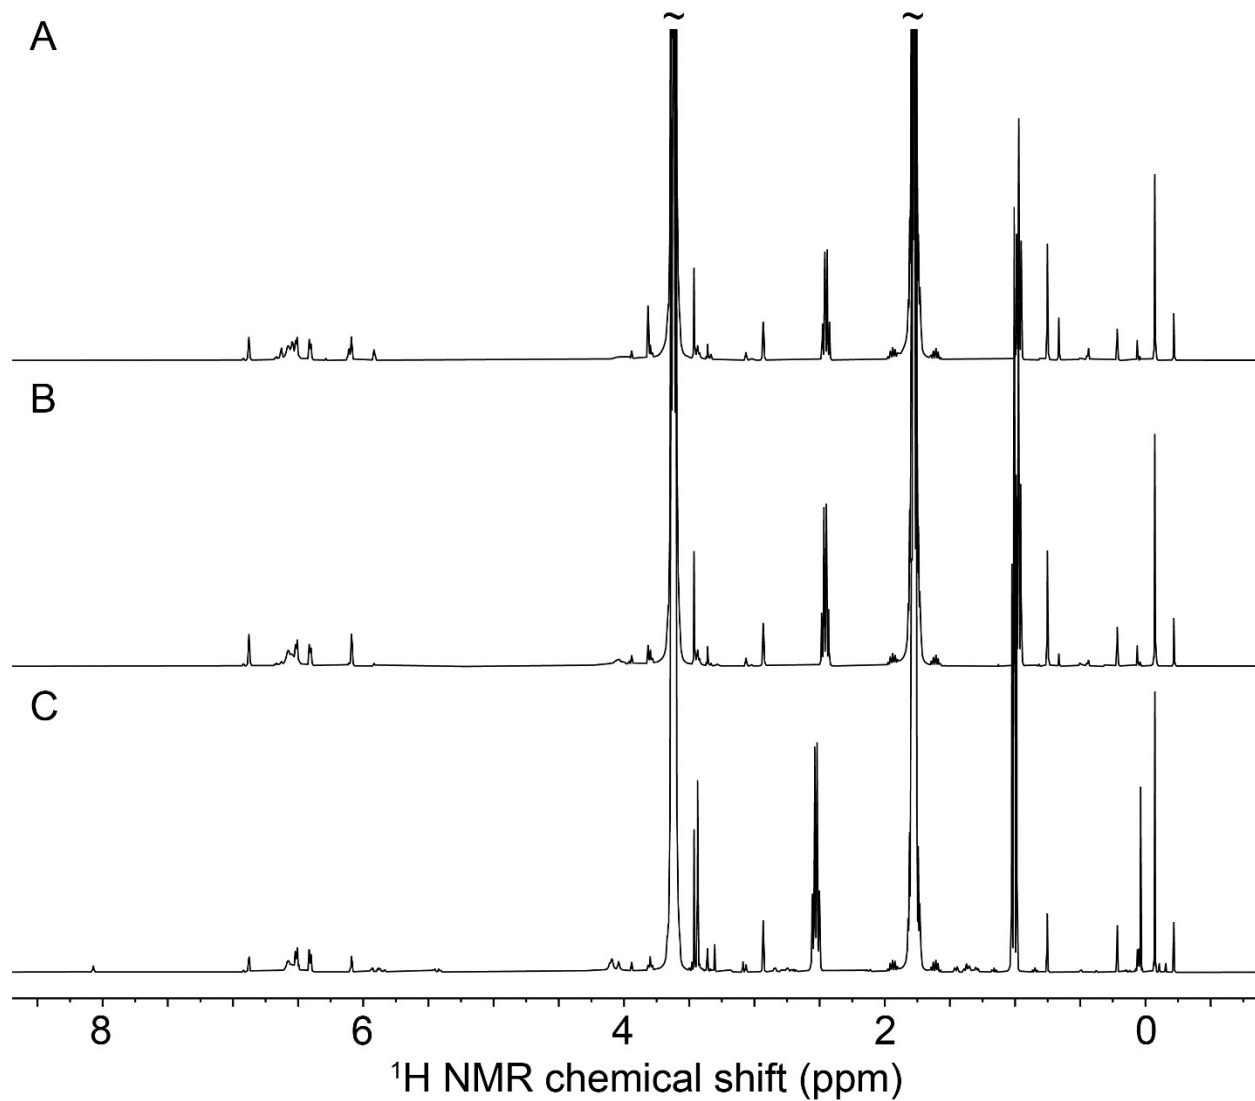

**Figure S12.**  $^1\text{H}$  NMR spectra of the reaction of  $\text{Me}_2\text{SiCp}_2\text{ZrCl}_2$  with MeOH and  $\text{Et}_3\text{N}$  in THF- $d_8$  after 3 hours at room temperature (A), 2 hours at 75 °C (B), and 3 days at 75 °C (C). ~ denotes THF signal cutoffs.

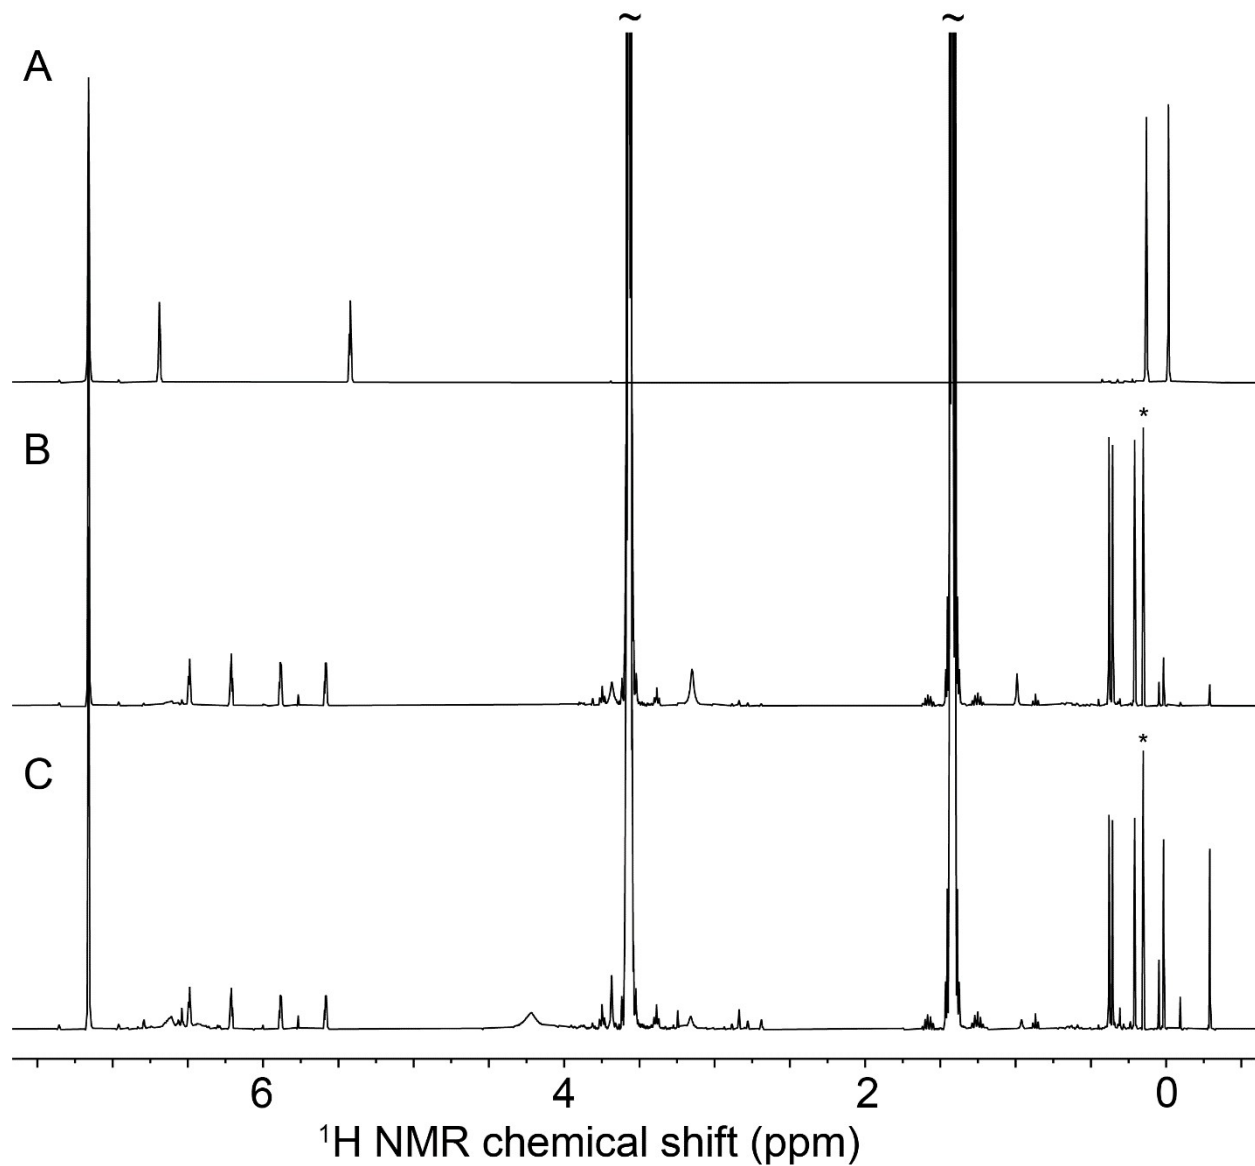

**Figure S13.**  $^1\text{H}$  NMR spectra of the reaction of  $\text{Me}_2\text{SiCp}_2\text{ZrMe}_2$  with  $\text{MeOH}$  in  $\text{benzene-}d_6$  prior to addition (A), 30 minutes at room temperature after addition of  $\text{MeOH}$  (B), and 3 hours at room temperature after addition of  $\text{MeOH}$  (C). ~ denotes THF signal cutoffs. \* denotes methane.

## Supplementary Tables

**Table S2.** Quality and accuracy of fits to synthetic RESPDOR data for (*dm*Phebox)Ir/Al<sub>2</sub>O<sub>3</sub> (50:50).

| S/N | 1-structure $\chi^2$ | 2-structure $\chi^2$ | CL / % | structure accuracy / % | population deviation / % |
|-----|----------------------|----------------------|--------|------------------------|--------------------------|
| 100 | 0.4481               | 0.0332               | 100.0  | 100                    | 0                        |
|     | 0.4566               | 0.0288               |        |                        |                          |
|     | 0.4593               | 0.0209               |        |                        |                          |
|     | 0.4728               | 0.0281               |        |                        |                          |
|     | 0.4915               | 0.0365               |        |                        |                          |
|     | <0.4657>             | <0.0295>             |        |                        |                          |
| 50  | 0.5534               | 0.1147               | 97.1   | 100                    | 0                        |
|     | 0.5403               | 0.0750               |        |                        |                          |
|     | 0.5921               | 0.0942               |        |                        |                          |
|     | 0.6086               | 0.1063               |        |                        |                          |
|     | 0.5591               | 0.0986               |        |                        |                          |
|     | <0.5707>             | <0.0978>             |        |                        |                          |
| 25  | 1.1361               | 0.5100               | 74.3   | 90                     | 16                       |
|     | 0.9364               | 0.4288               |        |                        |                          |
|     | 1.0782               | 0.3580               |        |                        |                          |
|     | 1.0325               | 0.4848               |        |                        |                          |
|     | 0.8737               | 0.4170               |        |                        |                          |
|     | <1.0114>             | <0.4397>             |        |                        |                          |
| 15  | 1.9574               | 1.0209               | 52.3   | 100                    | 28                       |
|     | 1.8258               | 1.2347               |        |                        |                          |
|     | 1.7593               | 1.1381               |        |                        |                          |
|     | 1.6744               | 1.2902               |        |                        |                          |
|     | 1.3297               | 0.9335               |        |                        |                          |
|     | <1.7093>             | <1.1235>             |        |                        |                          |
| 10  | 4.2174               | 3.2931               | 42.6   | 80                     | 12                       |
|     | 3.3696               | 2.7496               |        |                        |                          |
|     | 5.6838               | 4.1843               |        |                        |                          |
|     | 4.5922               | 3.2423               |        |                        |                          |
|     | 4.8218               | 3.6374               |        |                        |                          |
|     | <4.5370>             | <3.4213>             |        |                        |                          |
| 7.5 | 4.7797               | 4.0539               | 44.5   | 60                     | 36                       |
|     | 8.9076               | 6.0431               |        |                        |                          |
|     | 7.3497               | 5.2365               |        |                        |                          |
|     | 7.6114               | 5.7143               |        |                        |                          |
|     | 11.138               | 7.8920               |        |                        |                          |
|     | <7.9575>             | <5.7879>             |        |                        |                          |
| 5   | 384.44               | 349.02               | 25.4   | 20                     | 40                       |
|     | 34.619               | 23.957               |        |                        |                          |
|     | 32.917               | 23.376               |        |                        |                          |
|     | 49.985               | 49.857               |        |                        |                          |
|     | 93.921               | 93.908               |        |                        |                          |
|     | <119.17>             | <108.02>             |        |                        |                          |
| 2.5 | 1106.3               | 1008.6               | 10.5   | 0                      | 68                       |
|     | 63.462               | 61.540               |        |                        |                          |
|     | 80.018               | 80.018               |        |                        |                          |
|     | 74.876               | 74.810               |        |                        |                          |
|     | 78.805               | 77.183               |        |                        |                          |
|     | <280.69>             | <260.43>             |        |                        |                          |

**Table S3.** Quality and accuracy of fits to synthetic RESPDOR data for (*dm*Phebox)Ir/Al<sub>2</sub>O<sub>3</sub> (60:40).

| S/N | 1-structure $\chi^2$ | 2-structure $\chi^2$ | CL / % | structure accuracy / % | population deviation / % |
|-----|----------------------|----------------------|--------|------------------------|--------------------------|
| 100 | 0.4465               | 0.0237               | 100.0  | 100                    | 0                        |
|     | 0.4556               | 0.0188               |        |                        |                          |
|     | 0.4549               | 0.0277               |        |                        |                          |
|     | 0.4581               | 0.0254               |        |                        |                          |
|     | 0.4833               | 0.0240               |        |                        |                          |
|     | <0.4597>             | <0.0239>             |        |                        |                          |
| 50  | 0.5646               | 0.1084               | 95.0   | 100                    | 3                        |
|     | 0.5708               | 0.1215               |        |                        |                          |
|     | 0.5307               | 0.1278               |        |                        |                          |
|     | 0.6005               | 0.1076               |        |                        |                          |
|     | 0.5363               | 0.1103               |        |                        |                          |
|     | <0.5606>             | <0.1151>             |        |                        |                          |
| 25  | 0.9910               | 0.4165               | 75.6   | 100                    | 13                       |
|     | 1.0598               | 0.5049               |        |                        |                          |
|     | 1.1194               | 0.4301               |        |                        |                          |
|     | 0.9793               | 0.4309               |        |                        |                          |
|     | 0.8720               | 0.3490               |        |                        |                          |
|     | <1.0043>             | <0.4263>             |        |                        |                          |
| 15  | 1.6982               | 0.9840               | 54.0   | 90                     | 23                       |
|     | 1.4342               | 0.9771               |        |                        |                          |
|     | 1.4922               | 1.0859               |        |                        |                          |
|     | 1.4534               | 0.9321               |        |                        |                          |
|     | 2.4423               | 1.4704               |        |                        |                          |
|     | <1.7041>             | <1.0899>             |        |                        |                          |
| 10  | 3.1743               | 2.3905               | 56.3   | 60                     | 13                       |
|     | 3.1583               | 2.2109               |        |                        |                          |
|     | 6.6275               | 3.7552               |        |                        |                          |
|     | 8.0942               | 4.1265               |        |                        |                          |
|     | 5.1078               | 2.9691               |        |                        |                          |
|     | <5.2324>             | <3.0904>             |        |                        |                          |
| 7.5 | 14.119               | 9.3228               | 47.1   | 60                     | 13                       |
|     | 9.5851               | 6.8002               |        |                        |                          |
|     | 4.8512               | 4.0138               |        |                        |                          |
|     | 21.792               | 14.099               |        |                        |                          |
|     | 8.9573               | 6.5266               |        |                        |                          |
|     | <11.861>             | <8.1526>             |        |                        |                          |
| 5   | 61.108               | 59.492               | 24.8   | 40                     | 43                       |
|     | 22.861               | 16.406               |        |                        |                          |
|     | 15.225               | 13.274               |        |                        |                          |
|     | 365.34               | 365.32               |        |                        |                          |
|     | 26.878               | 22.602               |        |                        |                          |
|     | <98.283>             | <95.420>             |        |                        |                          |
| 2.5 | 79.863               | 79.667               | 12.9   | 10                     | 60                       |
|     | 82.961               | 82.954               |        |                        |                          |
|     | 66.735               | 66.675               |        |                        |                          |
|     | 54.419               | 49.993               |        |                        |                          |
|     | 61.236               | 51.254               |        |                        |                          |
|     | <69.043>             | <66.108>             |        |                        |                          |

**Table S4.** Quality and accuracy of fits to synthetic RESPDOR data for (*dm*Phebox)Ir/Al<sub>2</sub>O<sub>3</sub> (70:30).

| S/N | 1-structure $\chi^2$ | 2-structure $\chi^2$ | CL / % | structure accuracy / % | population deviation / % |
|-----|----------------------|----------------------|--------|------------------------|--------------------------|
| 100 | 0.4820               | 0.0225               | 100.0  | 100                    | 0                        |
|     | 0.5427               | 0.0303               |        |                        |                          |
|     | 0.5395               | 0.0266               |        |                        |                          |
|     | 0.5309               | 0.0303               |        |                        |                          |
|     | 0.5066               | 0.0254               |        |                        |                          |
|     | <0.5203>             | <0.0270>             |        |                        |                          |
| 50  | 0.6132               | 0.1273               | 95.7   | 100                    | 0                        |
|     | 0.6232               | 0.1169               |        |                        |                          |
|     | 0.5650               | 0.1021               |        |                        |                          |
|     | 0.7306               | 0.1335               |        |                        |                          |
|     | 0.5698               | 0.1245               |        |                        |                          |
|     | <0.6204>             | <0.1209>             |        |                        |                          |
| 25  | 0.6994               | 0.2837               | 74.8   | 100                    | 3                        |
|     | 0.9597               | 0.5042               |        |                        |                          |
|     | 1.0891               | 0.3421               |        |                        |                          |
|     | 1.0980               | 0.4360               |        |                        |                          |
|     | 0.7498               | 0.3873               |        |                        |                          |
|     | <0.9192>             | <0.3907>             |        |                        |                          |
| 15  | 1.6298               | 1.1582               | 53.0   | 90                     | 26                       |
|     | 2.2767               | 1.6042               |        |                        |                          |
|     | 1.8911               | 1.4206               |        |                        |                          |
|     | 1.5865               | 0.9442               |        |                        |                          |
|     | 2.1200               | 1.1033               |        |                        |                          |
|     | <1.9008>             | <1.2461>             |        |                        |                          |
| 10  | 4.3201               | 2.4540               | 44.2   | 80                     | 11                       |
|     | 3.6404               | 2.3380               |        |                        |                          |
|     | 2.9774               | 2.5391               |        |                        |                          |
|     | 2.6124               | 2.1031               |        |                        |                          |
|     | 5.9894               | 4.9798               |        |                        |                          |
|     | <3.9079>             | <2.8828>             |        |                        |                          |
| 7.5 | 6.2504               | 4.8824               | 32.6   | 60                     | 14                       |
|     | 5.1177               | 4.3074               |        |                        |                          |
|     | 50.246               | 49.268               |        |                        |                          |
|     | 4.7910               | 4.1924               |        |                        |                          |
|     | 13.431               | 9.4393               |        |                        |                          |
|     | <15.967>             | <14.418>             |        |                        |                          |
| 5   | 252.86               | 246.93               | 24.4   | 30                     | 43                       |
|     | 42.029               | 27.873               |        |                        |                          |
|     | 40.889               | 34.960               |        |                        |                          |
|     | 56.748               | 55.998               |        |                        |                          |
|     | 19.810               | 19.033               |        |                        |                          |
|     | <82.469>             | <76.959>             |        |                        |                          |
| 2.5 | 122.86               | 122.86               | 0.7    | 0                      | 43                       |
|     | 60.107               | 60.107               |        |                        |                          |
|     | 79.092               | 79.000               |        |                        |                          |
|     | 69.874               | 69.867               |        |                        |                          |

|          |          |
|----------|----------|
| 78.352   | 78.352   |
| <82.057> | <82.038> |

**Table S5.** Quality and accuracy of fits to synthetic RESPDOR data for (*dm*Phebox)Ir/Al<sub>2</sub>O<sub>3</sub> (80:20).

| S/N | 1-structure $\chi^2$ | 2-structure $\chi^2$ | CL / % | structure accuracy / % | population deviation / % |
|-----|----------------------|----------------------|--------|------------------------|--------------------------|
| 100 | 0.4429               | 0.0225               | 100.0  | 100                    | 0                        |
|     | 0.4378               | 0.0334               |        |                        |                          |
|     | 0.4783               | 0.0200               |        |                        |                          |
|     | 0.4865               | 0.0352               |        |                        |                          |
|     | 0.4621               | 0.0237               |        |                        |                          |
|     | <0.4615>             | <0.0270>             |        |                        |                          |
| 50  | 0.5419               | 0.1055               | 94.6   | 100                    | 0                        |
|     | 0.6087               | 0.1182               |        |                        |                          |
|     | 0.4733               | 0.0979               |        |                        |                          |
|     | 0.4720               | 0.1120               |        |                        |                          |
|     | 0.5493               | 0.1218               |        |                        |                          |
|     | <0.5290>             | <0.1111>             |        |                        |                          |
| 25  | 0.9176               | 0.4434               | 71.7   | 90                     | 25                       |
|     | 0.9601               | 0.4432               |        |                        |                          |
|     | 0.9543               | 0.3640               |        |                        |                          |
|     | 0.8344               | 0.3451               |        |                        |                          |
|     | 0.6681               | 0.3904               |        |                        |                          |
|     | <0.8669>             | <0.3972>             |        |                        |                          |
| 15  | 2.2082               | 1.5086               | 54.8   | 70                     | 20                       |
|     | 1.5101               | 1.0090               |        |                        |                          |
|     | 1.4709               | 0.8819               |        |                        |                          |
|     | 1.9315               | 1.4134               |        |                        |                          |
|     | 1.4571               | 0.7381               |        |                        |                          |
|     | <1.7156>             | <1.1102>             |        |                        |                          |
| 10  | 5.4217               | 3.8619               | 41.8   | 90                     | 33                       |
|     | 3.3201               | 2.5364               |        |                        |                          |
|     | 3.0545               | 2.6963               |        |                        |                          |
|     | 3.1689               | 2.3505               |        |                        |                          |
|     | 6.5457               | 4.7413               |        |                        |                          |
|     | <4.3022>             | <3.2373>             |        |                        |                          |
| 7.5 | 9.8526               | 6.1483               | 42.4   | 70                     | 18                       |
|     | 7.2672               | 5.8472               |        |                        |                          |
|     | 6.5794               | 5.1530               |        |                        |                          |
|     | 7.1989               | 5.7303               |        |                        |                          |
|     | 6.8079               | 5.3798               |        |                        |                          |
|     | <7.5412>             | <5.6517>             |        |                        |                          |
| 5   | 70.289               | 65.427               | 37.7   | 40                     | 45                       |
|     | 20.509               | 14.450               |        |                        |                          |
|     | 16.376               | 11.239               |        |                        |                          |
|     | 42.223               | 36.034               |        |                        |                          |
|     | 16.120               | 13.139               |        |                        |                          |
|     | <33.103>             | <28.058>             |        |                        |                          |
| 2.5 | 61.438               | 51.940               | 7.4    | 10                     | 80                       |
|     | 65.974               | 65.974               |        |                        |                          |

|          |          |
|----------|----------|
| 72.243   | 72.243   |
| 68.145   | 68.145   |
| 95.039   | 94.821   |
| <72.568> | <70.625> |

**Table S6.** Quality and accuracy of fits to synthetic RESPDOR data for (*dm*Phebox)Ir/Al<sub>2</sub>O<sub>3</sub> (90:10).

| S/N | 1-structure $\chi^2$ | 2-structure $\chi^2$ | CL / % | structure accuracy / % | population deviation / % |
|-----|----------------------|----------------------|--------|------------------------|--------------------------|
| 100 | 0.2250               | 0.0343               | 98.9   | 100                    | 0                        |
|     | 0.2117               | 0.0243               |        |                        |                          |
|     | 0.2309               | 0.0209               |        |                        |                          |
|     | 0.2312               | 0.0350               |        |                        |                          |
|     | 0.2212               | 0.0287               |        |                        |                          |
|     | <0.2240>             | <0.0286>             |        |                        |                          |
| 50  | 0.3451               | 0.1266               | 83.5   | 100                    | 0                        |
|     | 0.2834               | 0.0920               |        |                        |                          |
|     | 0.3406               | 0.1261               |        |                        |                          |
|     | 0.2643               | 0.0847               |        |                        |                          |
|     | 0.3725               | 0.1205               |        |                        |                          |
|     | <0.3212>             | <0.1100>             |        |                        |                          |
| 25  | 0.5683               | 0.4074               | 44.3   | 100                    | 2                        |
|     | 0.7833               | 0.6081               |        |                        |                          |
|     | 0.6862               | 0.4805               |        |                        |                          |
|     | 0.7020               | 0.5487               |        |                        |                          |
|     | 0.6677               | 0.4930               |        |                        |                          |
|     | <0.6815>             | <0.5075>             |        |                        |                          |
| 15  | 1.7087               | 1.3952               | 44.3   | 60                     | 35                       |
|     | 2.4268               | 1.8135               |        |                        |                          |
|     | 1.7863               | 1.4799               |        |                        |                          |
|     | 1.9779               | 1.2555               |        |                        |                          |
|     | 1.9104               | 1.2960               |        |                        |                          |
|     | <1.9620>             | <1.4480>             |        |                        |                          |
| 10  | 2.9864               | 2.7973               | 28.1   | 60                     | 22                       |
|     | 3.2142               | 2.8975               |        |                        |                          |
|     | 3.1500               | 2.6003               |        |                        |                          |
|     | 2.1058               | 1.9868               |        |                        |                          |
|     | 2.8833               | 2.2813               |        |                        |                          |
|     | <2.8680>             | <2.5126>             |        |                        |                          |
| 7.5 | 6.5729               | 5.1628               | 40.1   | 50                     | 24                       |
|     | 7.2546               | 6.8765               |        |                        |                          |
|     | 7.7675               | 6.1976               |        |                        |                          |
|     | 11.046               | 6.7431               |        |                        |                          |
|     | 12.579               | 9.1281               |        |                        |                          |
|     | <9.0443>             | <6.8216>             |        |                        |                          |
| 5   | 24.944               | 18.697               | 25.3   | 30                     | 53                       |
|     | 44.059               | 43.342               |        |                        |                          |
|     | 22.651               | 20.685               |        |                        |                          |
|     | 55.876               | 53.355               |        |                        |                          |
|     | 37.508               | 32.291               |        |                        |                          |
|     | <37.008>             | <33.674>             |        |                        |                          |



|     |          |          |     |   |     |
|-----|----------|----------|-----|---|-----|
| 2.5 | 73.025   | 72.992   | 5.6 | 0 | 100 |
|     | 63.613   | 63.585   |     |   |     |
|     | 93.356   | 92.462   |     |   |     |
|     | 68.439   | 66.958   |     |   |     |
|     | 94.803   | 94.450   |     |   |     |
|     | <78.647> | <78.089> |     |   |     |

**Table S7.** Quality and accuracy of fits to synthetic RESPDOR data for (*dm*Phebox)Ir/Al<sub>2</sub>O<sub>3</sub> (100:0).

| S/N | 1-structure $\chi^2$ | 2-structure $\chi^2$ | CL / % | structure accuracy / % | population deviation / % |
|-----|----------------------|----------------------|--------|------------------------|--------------------------|
| 100 | 0.0519               | 0.0292               | 55.4   | 100                    | 0                        |
|     | 0.0401               | 0.0275               |        |                        |                          |
|     | 0.0410               | 0.0254               |        |                        |                          |
|     | 0.0296               | 0.0202               |        |                        |                          |
|     | 0.0411               | 0.0252               |        |                        |                          |
|     | <0.0407>             | <0.0255>             |        |                        |                          |
| 50  | 0.1086               | 0.0910               | 29.8   | 100                    | 0                        |
|     | 0.1066               | 0.0898               |        |                        |                          |
|     | 0.1124               | 0.1038               |        |                        |                          |
|     | 0.1191               | 0.1077               |        |                        |                          |
|     | 0.1320               | 0.1111               |        |                        |                          |
|     | <0.1157>             | <0.1007>             |        |                        |                          |
| 25  | 0.3851               | 0.3816               | 24.4   | 100                    | 8                        |
|     | 0.4555               | 0.3941               |        |                        |                          |
|     | 0.5277               | 0.4720               |        |                        |                          |
|     | 0.4577               | 0.3679               |        |                        |                          |
|     | 0.3385               | 0.3206               |        |                        |                          |
|     | <0.4329>             | <0.3872>             |        |                        |                          |
| 15  | 0.7932               | 0.7499               | 24.2   | 100                    | 6                        |
|     | 1.1106               | 0.8668               |        |                        |                          |
|     | 1.2103               | 1.1452               |        |                        |                          |
|     | 1.3944               | 1.2721               |        |                        |                          |
|     | 1.2553               | 1.1912               |        |                        |                          |
|     | <1.1528>             | <1.0450>             |        |                        |                          |
| 10  | 7.5224               | 6.5717               | 31.2   | 80                     | 54                       |
|     | 4.1472               | 3.7082               |        |                        |                          |
|     | 6.0567               | 4.5653               |        |                        |                          |
|     | 3.0795               | 2.8734               |        |                        |                          |
|     | 3.7554               | 3.1109               |        |                        |                          |
|     | <4.9122>             | <4.1659>             |        |                        |                          |
| 7.5 | 50.168               | 46.281               | 31.0   | 80                     | 56                       |
|     | 19.955               | 18.202               |        |                        |                          |
|     | 5.0849               | 4.5628               |        |                        |                          |
|     | 11.455               | 9.4050               |        |                        |                          |
|     | 14.252               | 9.6715               |        |                        |                          |
|     | <20.183>             | <17.624>             |        |                        |                          |
| 5   | 48.373               | 48.013               | 23.1   | 60                     | 84                       |
|     | 19.257               | 17.070               |        |                        |                          |
|     | 17.028               | 12.627               |        |                        |                          |
|     | 10.289               | 9.4871               |        |                        |                          |

|     |          |          |     |   |     |
|-----|----------|----------|-----|---|-----|
|     | 77.766   | 75.734   |     |   |     |
|     | <34.543> | <32.586> |     |   |     |
| 2.5 | 80.990   | 80.939   | 4.5 | 0 | 100 |
|     | 135.21   | 135.21   |     |   |     |
|     | 122.61   | 121.22   |     |   |     |
|     | 84.268   | 84.250   |     |   |     |
|     | 69.338   | 68.128   |     |   |     |
|     | <98.484> | <97.951> |     |   |     |

**Table S8.** Quality and accuracy of fits to synthetic REDOR data for (NHC)Pt/SiO<sub>2</sub>.

| S/N | 1-structure $\chi^2$ | 2-structure $\chi^2$ | CL / % | structure accuracy / % | population deviation / % |
|-----|----------------------|----------------------|--------|------------------------|--------------------------|
| 100 | 2.3934               | 0.4366               | 98.5   | 90                     | 4                        |
|     | 2.3044               | 0.2781               |        |                        |                          |
|     | 2.3180               | 0.3150               |        |                        |                          |
|     | 2.2992               | 0.3058               |        |                        |                          |
|     | 2.2290               | 0.3065               |        |                        |                          |
|     | <2.3088>             | <0.3284>             |        |                        |                          |
| 50  | 2.6828               | 0.5640               | 95.0   | 70                     | 8                        |
|     | 2.5048               | 0.4876               |        |                        |                          |
|     | 2.6210               | 0.5813               |        |                        |                          |
|     | 2.5426               | 0.4914               |        |                        |                          |
|     | 2.6230               | 0.5528               |        |                        |                          |
|     | <2.5949>             | <0.5354>             |        |                        |                          |
| 25  | 3.0282               | 1.2198               | 79.3   | 90                     | 16                       |
|     | 3.1892               | 1.2936               |        |                        |                          |
|     | 3.0061               | 1.2051               |        |                        |                          |
|     | 3.1647               | 1.2440               |        |                        |                          |
|     | 3.1727               | 1.0278               |        |                        |                          |
|     | <3.1122>             | <1.1981>             |        |                        |                          |
| 15  | 5.7079               | 3.6794               | 63.3   | 80                     | 20                       |
|     | 4.9661               | 2.6840               |        |                        |                          |
|     | 5.5532               | 2.6700               |        |                        |                          |
|     | 4.9033               | 2.2866               |        |                        |                          |
|     | 4.5925               | 2.8722               |        |                        |                          |
|     | <5.1446>             | <2.8385>             |        |                        |                          |
| 10  | 16.4127              | 13.715               | 42.1   | 40                     | 48                       |
|     | 10.5241              | 7.0600               |        |                        |                          |
|     | 26.2491              | 23.084               |        |                        |                          |
|     | 16.5870              | 12.287               |        |                        |                          |
|     | 9.12321              | 6.1458               |        |                        |                          |
|     | <15.7792>            | <12.458>             |        |                        |                          |
| 7.5 | 44.0441              | 36.539               | 34.0   | 60                     | 76                       |
|     | 38.8287              | 33.751               |        |                        |                          |
|     | 20.1957              | 16.175               |        |                        |                          |
|     | 25.6586              | 22.376               |        |                        |                          |
|     | 20.8328              | 16.923               |        |                        |                          |
|     | <29.9120>            | <25.153>             |        |                        |                          |
| 5   | 84.2597              | 81.831               | 13.6   | 50                     | 72                       |
|     | 87.2260              | 82.938               |        |                        |                          |
|     | 79.2405              | 75.898               |        |                        |                          |

|     |           |           |     |    |    |
|-----|-----------|-----------|-----|----|----|
|     | 2866.90   | 2851.8    |     |    |    |
|     | 121.847   | 118.10    |     |    |    |
|     | <647.895> | <642.13>  |     |    |    |
| 2.5 | 659.583   | 654.81    | 6.9 | 40 | 92 |
|     | 1397.41   | 1390.3    |     |    |    |
|     | 1505.08   | 1484.8    |     |    |    |
|     | 997.414   | 972.55    |     |    |    |
|     | 120990    | 120990    |     |    |    |
|     | <25109.9> | <25098.5> |     |    |    |

**Table S9.** Quality and accuracy of fits to synthetic REDOR data for (Phen)Zn/SiO<sub>2</sub>.

| S/N | 1-structure $\chi^2$ | 2-structure $\chi^2$ | CL / % | structure accuracy / % | population deviation / % |
|-----|----------------------|----------------------|--------|------------------------|--------------------------|
| 100 | 1.3511               | 0.0487               | 100.0  | 100                    | 0                        |
|     | 1.4130               | 0.0527               |        |                        |                          |
|     | 1.4670               | 0.0432               |        |                        |                          |
|     | 1.2363               | 0.0380               |        |                        |                          |
|     | 1.2953               | 0.0440               |        |                        |                          |
|     | <1.3525>             | <0.0453>             |        |                        |                          |
| 50  | 1.6504               | 0.2186               | 99.4   | 100                    | 0                        |
|     | 1.5786               | 0.1457               |        |                        |                          |
|     | 1.5211               | 0.1911               |        |                        |                          |
|     | 1.6649               | 0.1823               |        |                        |                          |
|     | 1.4615               | 0.1737               |        |                        |                          |
|     | <1.5753>             | <0.1823>             |        |                        |                          |
| 25  | 1.7902               | 0.6117               | 84.9   | 60                     | 20                       |
|     | 1.8745               | 0.6061               |        |                        |                          |
|     | 2.3480               | 0.6044               |        |                        |                          |
|     | 2.3169               | 0.7260               |        |                        |                          |
|     | 2.2575               | 0.8899               |        |                        |                          |
|     | <2.1174>             | <0.6876>             |        |                        |                          |
| 15  | 2.9488               | 1.7172               | 60.8   | 70                     | 16                       |
|     | 2.4493               | 1.3417               |        |                        |                          |
|     | 3.1950               | 1.8343               |        |                        |                          |
|     | 2.9005               | 1.6176               |        |                        |                          |
|     | 3.0297               | 1.8878               |        |                        |                          |
|     | <2.9047>             | <1.6797>             |        |                        |                          |
| 10  | 6.6166               | 4.6266               | 48.9   | 70                     | 36                       |
|     | 7.1705               | 5.4280               |        |                        |                          |
|     | 14.737               | 8.7608               |        |                        |                          |
|     | 5.2393               | 3.6565               |        |                        |                          |
|     | 4.3898               | 3.2364               |        |                        |                          |
|     | <7.6308>             | <5.1416>             |        |                        |                          |
| 7.5 | 29.046               | 27.426               | 34.2   | 80                     | 40                       |
|     | 11.238               | 8.4850               |        |                        |                          |
|     | 17.111               | 13.224               |        |                        |                          |
|     | 66.990               | 64.098               |        |                        |                          |
|     | 9.9752               | 6.7959               |        |                        |                          |
|     | <26.872>             | <24.006>             |        |                        |                          |
| 5   | 384.69               | 373.42               | 21.3   | 50                     | 72                       |
|     | 72.435               | 70.329               |        |                        |                          |

|     |          |          |     |    |    |
|-----|----------|----------|-----|----|----|
|     | 26.895   | 21.579   |     |    |    |
|     | 53.086   | 41.150   |     |    |    |
|     | 422.26   | 422.26   |     |    |    |
|     | <191.87> | <185.75> |     |    |    |
| 2.5 | 3666.4   | 3638.6   | 4.2 | 50 | 96 |
|     | 1550.6   | 1550.5   |     |    |    |
|     | 3672.4   | 3672.4   |     |    |    |
|     | 95.790   | 93.040   |     |    |    |
|     | 342450   | 342450   |     |    |    |
|     | <70287>  | <70280>  |     |    |    |

**Table S10.** Quality and accuracy of fits to synthetic REDOR data for  $(\kappa^2\text{-(NiPr)}_2\text{CH})_2\text{Sc/SiO}_2$ .

| S/N | 1-structure $\chi^2$ | 2-structure $\chi^2$ | CL / % | structure accuracy / % | population deviation / % |
|-----|----------------------|----------------------|--------|------------------------|--------------------------|
| 100 | 0.1373               | 0.0738               | 65.9   | 50                     | 24                       |
|     | 0.1518               | 0.0746               |        |                        |                          |
|     | 0.1275               | 0.0740               |        |                        |                          |
|     | 0.1361               | 0.0697               |        |                        |                          |
|     | 0.1514               | 0.0756               |        |                        |                          |
|     | <0.1408>             | <0.0735>             |        |                        |                          |
| 50  | 0.1832               | 0.1157               | 53.7   | 50                     | 20                       |
|     | 0.1870               | 0.1242               |        |                        |                          |
|     | 0.1987               | 0.1104               |        |                        |                          |
|     | 0.1516               | 0.1159               |        |                        |                          |
|     | 0.1516               | 0.0953               |        |                        |                          |
|     | <0.1744>             | <0.1123>             |        |                        |                          |
| 25  | 0.4003               | 0.3181               | 32.2   | 50                     | 20                       |
|     | 0.4258               | 0.3891               |        |                        |                          |
|     | 0.3055               | 0.2543               |        |                        |                          |
|     | 0.3775               | 0.3655               |        |                        |                          |
|     | 0.2870               | 0.1997               |        |                        |                          |
|     | <0.3592>             | <0.3053>             |        |                        |                          |
| 15  | 0.8350               | 0.8151               | 19.4   | 60                     | 44                       |
|     | 0.6635               | 0.6081               |        |                        |                          |
|     | 0.8273               | 0.8229               |        |                        |                          |
|     | 0.7404               | 0.6707               |        |                        |                          |
|     | 0.7468               | 0.6526               |        |                        |                          |
|     | <0.7626>             | <0.7139>             |        |                        |                          |
| 10  | 2.9294               | 2.8854               | 13.0   | 50                     | 64                       |
|     | 1.0710               | 1.0230               |        |                        |                          |
|     | 4.1769               | 4.0408               |        |                        |                          |
|     | 2.5877               | 2.5512               |        |                        |                          |
|     | 2.4380               | 2.3656               |        |                        |                          |
|     | <2.6406>             | <2.5732>             |        |                        |                          |
| 7.5 | 12.603               | 12.084               | 14.0   | 50                     | 56                       |
|     | 5.0274               | 4.7939               |        |                        |                          |
|     | 22.875               | 22.779               |        |                        |                          |
|     | 4.7082               | 4.6621               |        |                        |                          |
|     | 6.9108               | 6.3623               |        |                        |                          |
|     | <10.425>             | <10.136>             |        |                        |                          |
| 5   | 12.881               | 12.285               | 4.2    | 50                     | 100                      |

---

|     |          |          |     |    |     |
|-----|----------|----------|-----|----|-----|
|     | 59.153   | 59.153   |     |    |     |
|     | 29.081   | 29.081   |     |    |     |
|     | 62984    | 62864    |     |    |     |
|     | 27421    | 274218   |     |    |     |
|     | <18101>  | <18077>  |     |    |     |
| 2.5 | 647.02   | 647.02   | 0.0 | 50 | 100 |
|     | 556.26   | 556.26   |     |    |     |
|     | 3735.1   | 3735.1   |     |    |     |
|     | 164.45   | 164.45   |     |    |     |
|     | 174.29   | 174.29   |     |    |     |
|     | <1055.4> | <1055.4> |     |    |     |

---

### Supplementary References

- (1) R. Wischert, P. Laurent, C. Copéret, F. Delbecq, P. Sautet, *J. Am. Chem. Soc.* 2012, **134**, 14430–14449.
- (2) S. R. Flynn, O. J. Metters, I. Manners, D. F. Wass, *Organometallics* 2016, **35**, 847–850.
